# Supplementary figures and images for: Autophagy and Mitophagy Promotion in a Rat Model of Endometriosis
Source: MDPI journal article supplement (doi:10.3390/ijms22105074), 2021-05-11

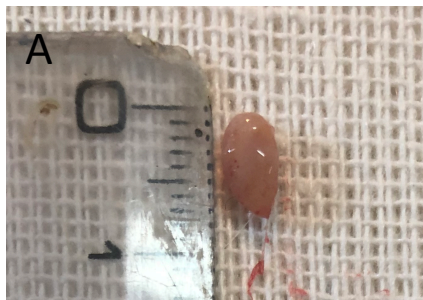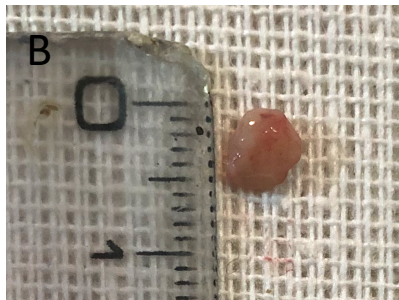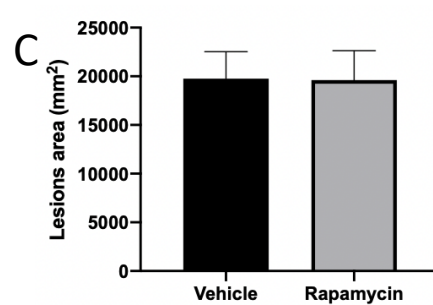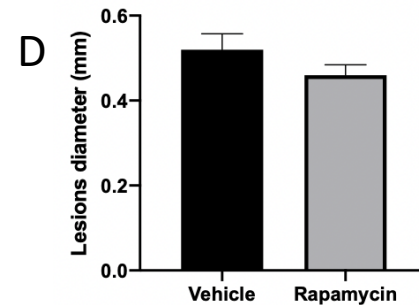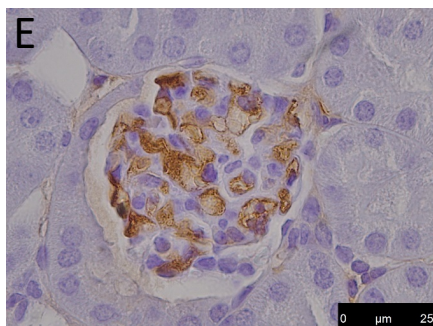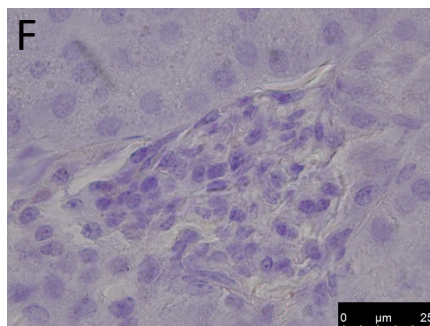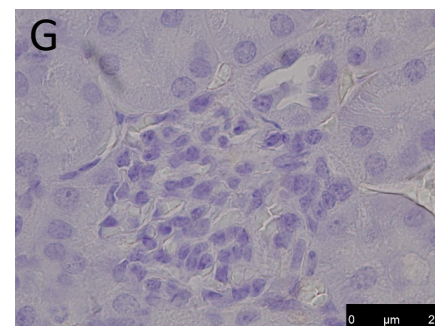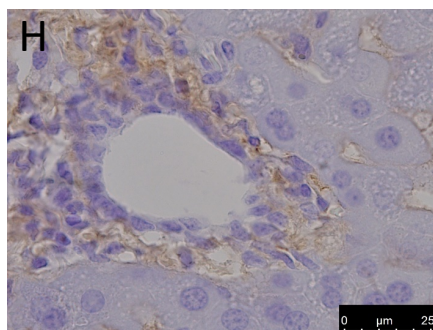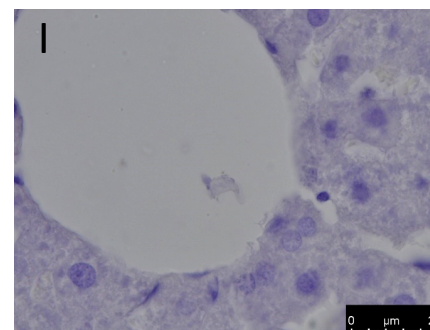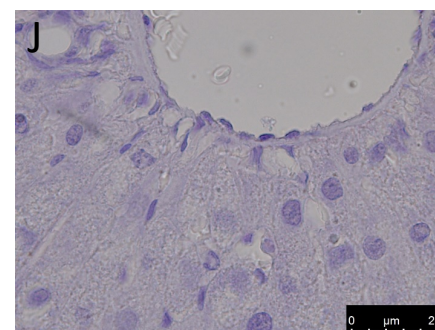

Supplement: s1 [file s1]
